# Supplementary material for: Na2.3Cu1.1Mn2O7−δ nanoflakes as enhanced cathode materials for high-energy sodium-ion batteries achieved by a rapid pyrosynthesis approach
Source: Royal Society of Chemistry journal article supplement (doi:10.1039/c9ta09890a), 2019-12-04
Supplement: c9ta09890a1.pdf [file c9ta09890a1.pdf]

## Electronic Supplementary File

### **Na<sub>2.3</sub>Cu<sub>1.1</sub>Mn<sub>2</sub>O<sub>7-δ</sub> nanoflakes as enhanced cathode materials for high-energy sodium-ion batteries achieved by a rapid pyrosynthesis approach†**

Vaiyapuri Soundharrajan<sup>a</sup>, Balaji Sambandam<sup>a</sup>, Muhammad H. Alfaruqi<sup>ab</sup>, Sungjin Kim<sup>a</sup>,

Jeonggeun Jo<sup>a</sup>, Seokhun Kim<sup>a</sup>, Vinod Mathew<sup>a</sup>, Yang-kook Sun<sup>c</sup>, Jaekook Kim<sup>a\*</sup>

<sup>a</sup>Department of Materials Science and Engineering, Chonnam National University, 300Yongbong-dong, Bukgu, Gwangju 500-757, South Korea; Fax: +82-62-530-1699; Tel: +82-62-530-1703

<sup>b</sup>Department of Teknik Metalurgi, Universitas Tekonolgi Sumbawa, Jl. Raya Olat Maras, Sumbawa, Nusa Tenggara Barat 84371, Indonesia.

<sup>c</sup>Department of Energy Engineering, Hanyang University, Seoul 133-791, Republic of Korea.

\*E-mail: [jaekook@chonnam.ac.kr](mailto:jaekook@chonnam.ac.kr)

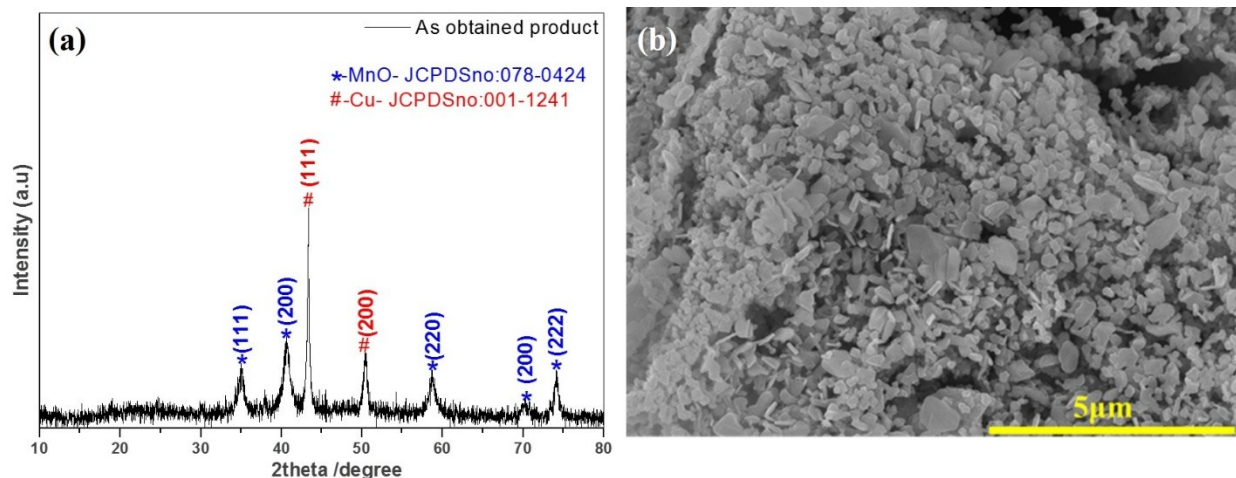

**Fig. S1.** (a) PXRD pattern of the combustion deposits (b) SEM image of the combustion deposits.

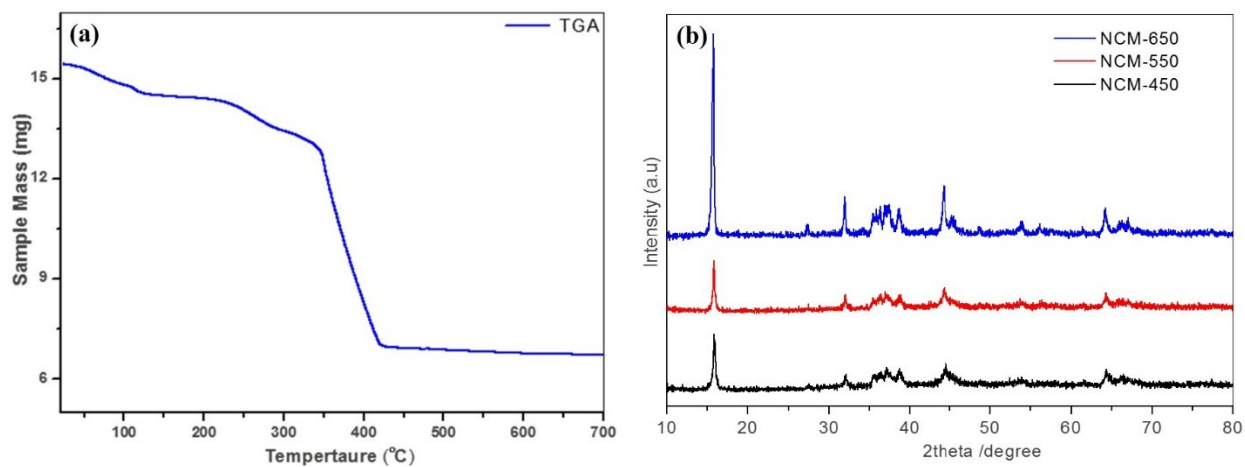

**Fig. S2.** (a) TG plot for  $\text{Na}_{2.3}\text{Cu}_{1.1}\text{Mn}_2\text{O}_{7.6}$  nanodiscs under air atmosphere at  $5^\circ\text{C}/\text{min}$ , (b) PXRD pattern for  $\text{Na}_{2.3}\text{Cu}_{1.1}\text{Mn}_2\text{O}_{7.6}$  obtained at different temperatures.

| Element                                                                             | Wyckoff Positions |         |          | SOF  | B <sub>iso</sub> |
|-------------------------------------------------------------------------------------|-------------------|---------|----------|------|------------------|
|                                                                                     | x                 | y       | z        |      |                  |
| Na                                                                                  | 0.35533           | 0.39403 | 0.90521  | 0.6  | 1.2563           |
| Na                                                                                  | 0.39069           | 0.91516 | 0.85114  | 1    | 0.84523          |
| Na                                                                                  | 0.61369           | 0.08403 | 0.3647   | 1    | 1.89563          |
| Na                                                                                  | 0.02416           | 0.55666 | 0.39748  | 1    | 0.986            |
| Na                                                                                  | 0.25408           | 0.71021 | 0.05205  | 1    | 1.69253          |
| Cu                                                                                  | 0.10795           | 0.0213  | -0.00018 | 0.73 | 0.98654          |
| Cu                                                                                  | 0.25587           | 0.27704 | 0.41366  | 0.73 | 1.15633          |
| Cu                                                                                  | 0.1252            | 0.13265 | 0.67467  | 0.73 | 1.98542          |
| Mn                                                                                  | 0.44928           | 0.39066 | 0.14224  | 1    | 1.2653           |
| Mn                                                                                  | 0.88833           | 0.85148 | 0.27072  | 1    | 0.99786          |
| Mn                                                                                  | 0.74833           | 0.73209 | 0.57559  | 1    | 0.36548          |
| Mn                                                                                  | 0.58697           | 0.56874 | 0.85726  | 1    | 0.2564           |
| O                                                                                   | 0.81613           | 0.7482  | 0.8184   | 1    | 1.0256           |
| O                                                                                   | 0.40108           | 0.57027 | 0.57437  | 1    | 0.56846          |
| O                                                                                   | 0.8507            | 0.01723 | 0.76468  | 1    | 1.6987           |
| O                                                                                   | 0.4905            | 0.28773 | 0.69957  | 1    | 0.5489           |
| O                                                                                   | 0.72062           | 0.82265 | 0.03224  | 1    | 1.28315          |
| O                                                                                   | 0.66253           | 0.42435 | 0.38591  | 1    | 0.587            |
| O                                                                                   | 0.25082           | 0.43003 | 0.8788   | 1    | 0.4586           |
| O                                                                                   | 0.00302           | 0.86916 | 0.52292  | 1    | 1.02548          |
| O                                                                                   | 0.74766           | 0.53118 | 0.10741  | 1    | 1.16548          |
| O                                                                                   | 0.6623            | 0.75732 | 0.28137  | 1    | 0.65422          |
| O                                                                                   | 0.35637           | 0.13462 | -0.03734 | 1    | 1.53248          |
| R <sub>wp</sub> = 4.009, R <sub>p</sub> = 2.73, R <sub>exp</sub> = 3.42, GoF = 1.36 |                   |         |          |      |                  |
| a = 6.46728 Å, b = 7.22589 Å, c = 7.63356 Å                                         |                   |         |          |      |                  |
| α = 103.2434°, β = 110.0294°, γ = 111.3249°                                         |                   |         |          |      |                  |

**Table S1** Crystallographic data of the NCuMnO-650 powder obtained from Rietveld refinement.

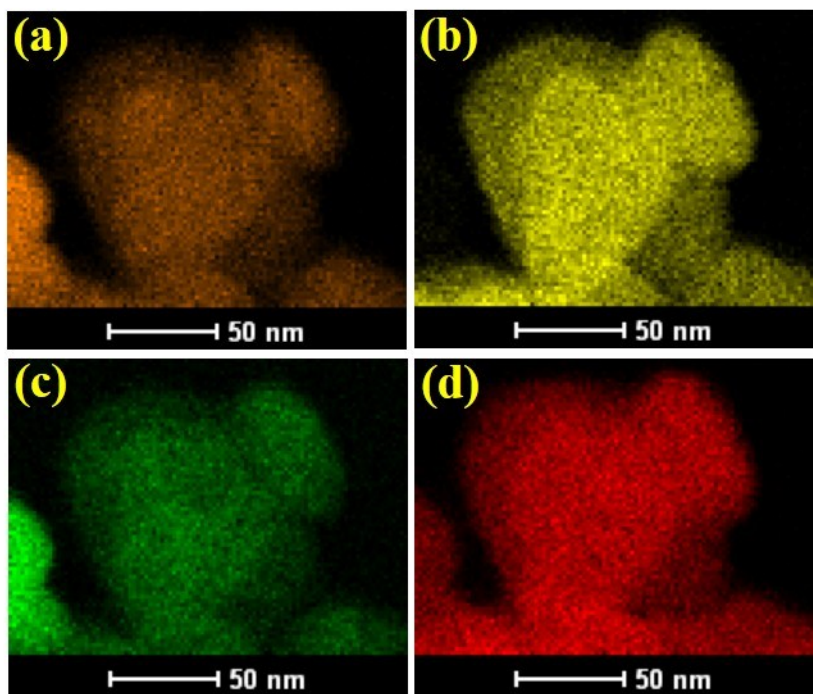

**Fig. S3.** Elemental mapping analysis of NCuMnO powder; bright filed image with corresponding elements, (a) Na, (b) Cu, (c) Mn and (O).

**Table S2.** ICP-OES analysis of NCuMnO powder.

| Element | Wavelength (nm) | Concentration (wt %) |
|---------|-----------------|----------------------|
| Na      | 589.592         | 12.0                 |
| Cu      | 327.393         | 20.4                 |
| Mn      | 257.61          | 31.9                 |

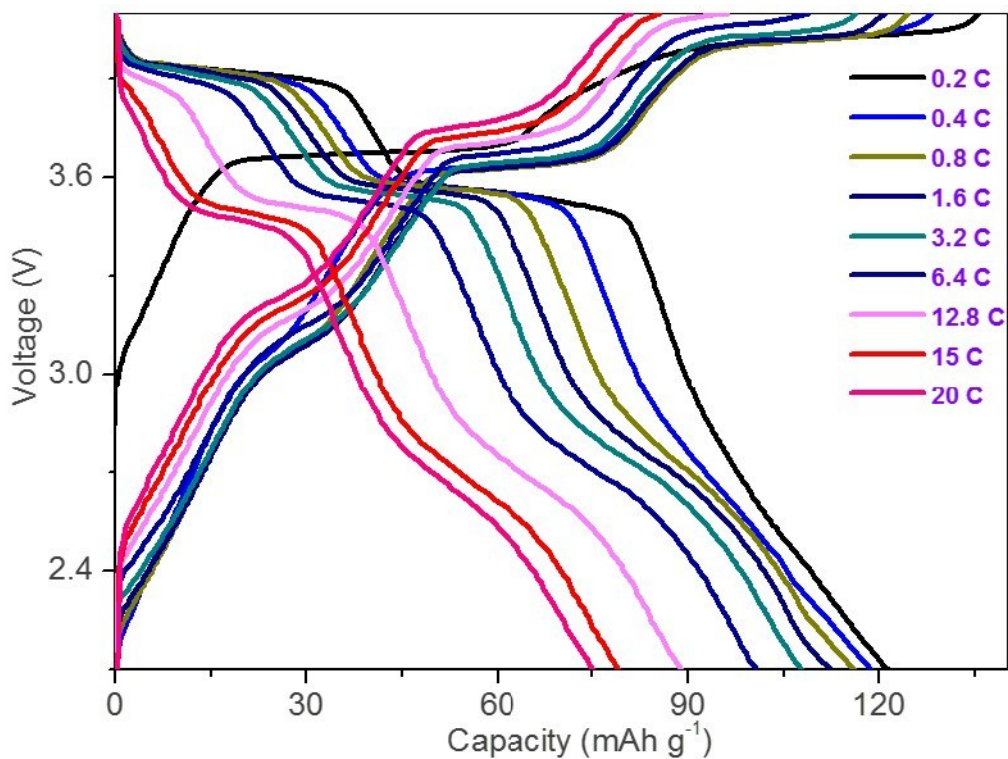

**Fig. S4.** Charge/discharge pattern for  $\text{Na}_{2.3}\text{Cu}_{1.1}\text{Mn}_2\text{O}_{7.6}$  obtained at different C rate.

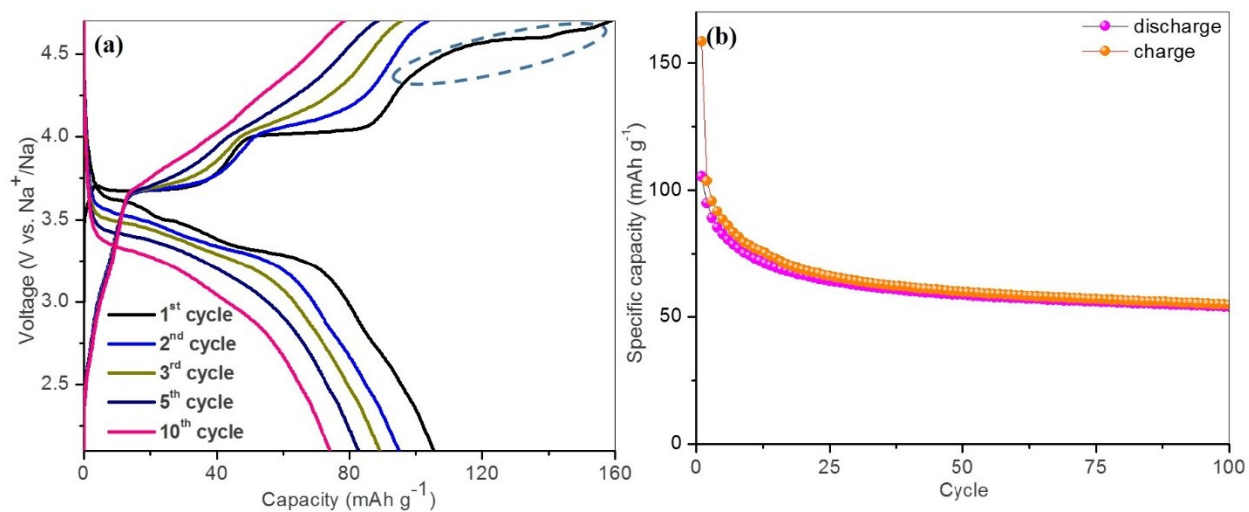

**Fig. S5.** (a) charge/discharge pattern for oxygen-redox region of  $\text{Na}_{2.3}\text{Cu}_{1.1}\text{Mn}_2\text{O}_{7.6}$  obtained between 4.7 and 2.1 V, (b) corresponding cycle stability of the oxygen-redox region of  $\text{NCuMnO}$  between 4.7 and 2.1 V.

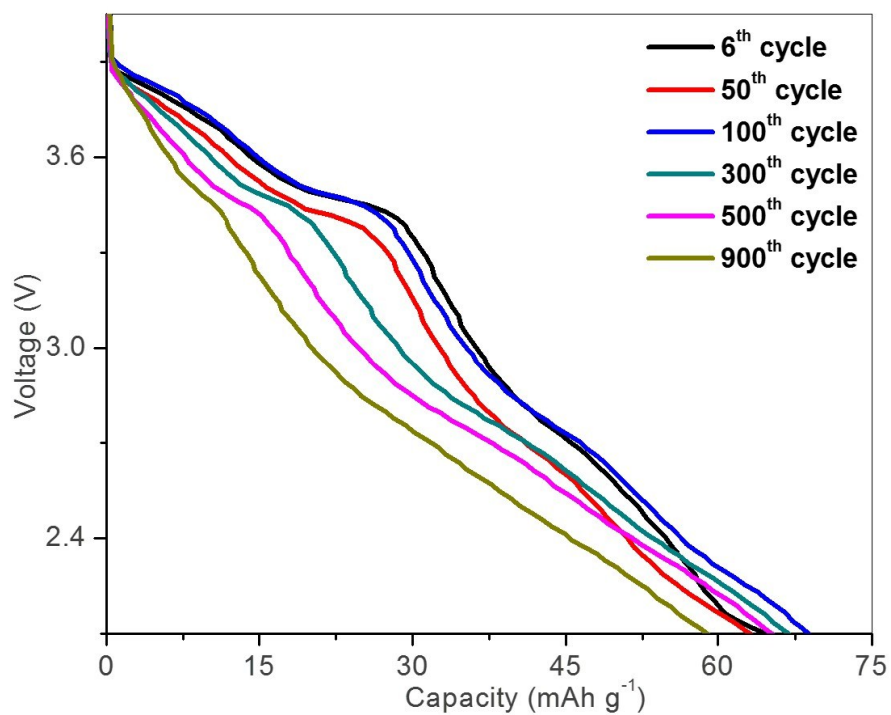

**Fig. S6.** Discharge pattern for NCuMnO-650 sample obtained at 10C rate.

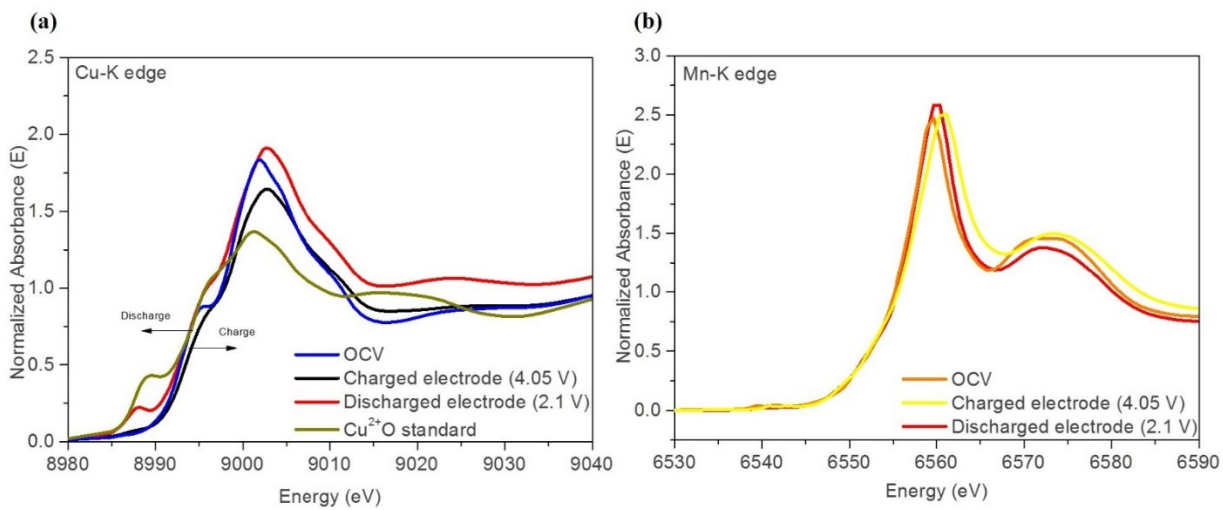

**Fig. S7.** *Ex situ* XANES spectra obtained for the  $\text{Na}_{0.3}\text{Cu}_{1.1}\text{Mn}_{2.7-6}\text{O}_7$  cathode under different states of charge/discharge conditions (a) Cu-K edge, and (b) Mn-K edge.

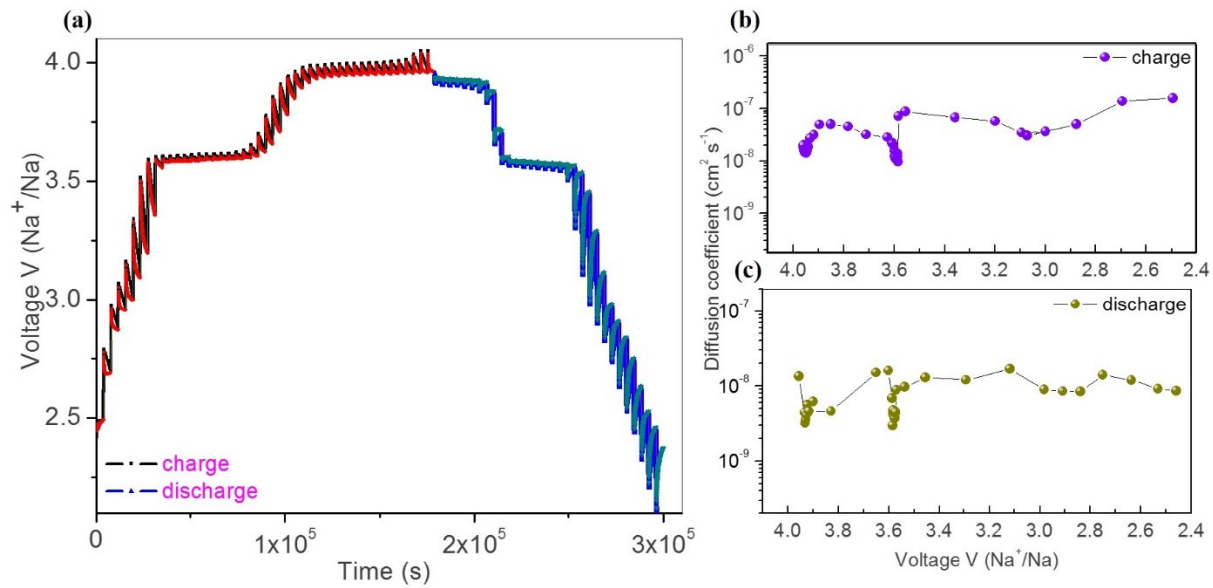

**Fig. S8** (a) Voltage profile of NCuMnO-650 cathode during GITT at  $20 \text{ mA g}^{-1}$  for the 21<sup>st</sup> cycle, sodium ion chemical diffusion coefficient calculated from GITT curves during electrochemical reaction (b) charge and (c) discharge.
